# Supplementary material
Source: HighWire-hosted journal article supplement (https://bmjopen.bmj.com/content/12/5/e057914)
Supplement: inline-supplementary-material-1 [file inline-supplementary-material-1.pdf]

**Supplemental Table 1.** Sample characteristics stratified by recruitment method. N=1,452. Chi-squared and paired t-tests assessed differences between methods. Alpha=0.05. Column percentages presented. Data collected via phone and online surveys from Senegalese adults between June-August 2020.

| Characteristic    | Category                 | Phone     | Online    | Total     | p     |
|-------------------|--------------------------|-----------|-----------|-----------|-------|
| Age (Mean/Median) |                          | 28.5/27.0 | 25.0/23.0 | 28.0/26.0 | <.001 |
| Age Quartile      | <21                      | 23.1      | 30.7      | 24.3      | <.001 |
|                   | 22-25                    | 22.3      | 34.6      | 24.2      |       |
|                   | 26-34                    | 23.9      | 26.8      | 24.4      |       |
|                   | 35+                      | 30.7      | 7.8       | 27.1      |       |
| Sex               | Female                   | 50.1      | 60.6      | 51.8      | 0.003 |
|                   | Male                     | 49.9      | 39.4      | 48.2      |       |
| Location          | Urban                    | 74.7      | 89.6      | 77.1      | <.001 |
|                   | Rural                    | 23.0      | 4.4       | 20.1      |       |
|                   | Urban + Rural            | 2.3       | 6.1       | 2.9       |       |
| Education         | Superior                 | 16.1      | 79.7      | 26.2      | <.001 |
|                   | Secondary                | 25.1      | 16.0      | 23.7      |       |
|                   | Primary                  | 23.3      | 0.0       | 19.6      |       |
|                   | Middle                   | 18.6      | 1.7       | 15.9      |       |
|                   | No                       | 11.8      | 0.4       | 10.0      |       |
|                   | Other                    | 5.1       | 2.2       | 4.6       |       |
| Marital status    | Single                   | 50.9      | 78.8      | 55.4      | <.001 |
|                   | Married - monogamous     | 34.9      | 14.7      | 31.7      |       |
|                   | Married - polygamist     | 12.5      | 3.9       | 11.1      |       |
|                   | Divorced                 | 1.2       | 2.2       | 1.4       |       |
|                   | Widower                  | 0.5       | 0.4       | 0.5       |       |
| Occupation        | Informal sector          | 45.6      | 5.2       | 39.2      | <.001 |
|                   | Student                  | 20.0      | 67.5      | 27.6      |       |
|                   | Formal sector            | 14.6      | 20.4      | 15.5      |       |
|                   | Other                    | 8.4       | 3.9       | 7.7       |       |
|                   | Housewife                | 7.5       | 2.2       | 6.6       |       |
|                   | Retired, out of work     | 3.9       | 0.9       | 3.4       |       |
|                   | Religious leader         | 0.1       | 0.0       | 0.1       |       |
| Religion          | Muslim                   | 95.9      | 87.0      | 94.5      | <.001 |
|                   | Catholic                 | 3.9       | 7.8       | 4.5       |       |
|                   | Protestant / Evangelical | 0.1       | 3.0       | 0.6       |       |
|                   | No                       | 0.0       | 1.3       | 0.2       |       |
|                   | Other                    | 0.1       | 0.9       | 0.2       |       |
|                   | Traditionalist           | 0.1       | 0.0       | 0.1       |       |

**Supplemental Table 2.** Descriptive statistics for novel COVID-19 subscales on knowledge & awareness (n=1,447), perceived threat (n=1,445), prevention behaviors (n=1,447), and all subscales combined (n=1,441). Subscales ranged from 0 [min] to 15 [max]; total scale ranged from 0 to 45. Data collected via phone and online surveys from Senegalese adults between June-August 2020.

|                       | Mean | SD  | Median |
|-----------------------|------|-----|--------|
| Knowledge & awareness | 11.8 | 2.6 | 12.5   |
| Perceived threat      | 10.9 | 3.5 | 11.7   |
| Prevention behaviors  | 10.5 | 2.3 | 11.0   |
| Total                 | 33.1 | 6.0 | 34.0   |
